# Supplementary material
Source: PubMed Central journal article supplement (PMC1780171)

## Supplementary Material

### Supplementary Figure 1:

Example responses to pure tones and harmonic complex tones from a pitch-selective neuron (**a, d**) (Unit M36n-514) and a non-pitch-selective neuron (**b, e**) (Unit M2p-140). **a.** Pure tone frequency response from a pitch-selective neuron. **b.** Pure tone frequency response from a non-pitch neuron. **c.** Harmonic complex tone stimuli used in generating responses shown in **d**) and **e**). The fundamental frequency component ( $f_0$ ) is only present in the top stimulus and is placed at the neuron's CF. The bottom five stimuli lack the  $f_0$  component and have all of the harmonics outside the neuron's excitatory frequency response area. **d.** Harmonic complex response from a pitch-selective neuron. This neuron responds to all stimuli, including when the  $f_0$  component is missing. The harmonic complex stimuli have Schroeder negative phase. **e.** Harmonic complex response from a non-pitch neuron. This neuron only responds to a harmonic complex when the  $f_0$  component (located at its CF) is present. The harmonic complex stimuli have cosine phase.

### Supplementary Figure 2:

**a, b.** CF maps and locations of pitch-selective neurons from two additional marmosets. **c.** Distribution of standard deviations of CFs (in octaves) in three cortical CF maps. The CF at each location on a map was determined by taking the median of the CFs from neighboring recording sites within a 0.25 mm radius.

### **Supplementary Figure 3:**

Pitch-selective neurons show similar tuning to pure tones and MFs. **a-b.** Two additional examples of the tuning of individual pitch-selective neurons, Unit M41o-294 (**a**) and Unit M2p\_207 (**b**) to pure tone frequency and the  $f_0$  of MFs.

### **Supplementary Figure 4:**

Neuronal responses to changes in pitch salience. Error bars represent SEM. **a.** Response of a pitch-selective neuron (Unit M41o-248) to irregular click trains with a tone carrier. The discharge rate of the neuron decreased as the pitch strength of the click train decreased (with increasing temporal jitter). **b.** Response of a pitch-selective neuron (Unit M36n-523) to irregular click trains with a noise carrier. The discharge rate of the neuron decreased as the pitch strength of the click train decreased (with increasing temporal jitter). **c.** Response of a pitch-selective neuron (Unit M36n-514) to IRN stimuli. The discharge rate increased with increasing pitch salience (caused by increasing the number of iterations used to generate the IRN stimuli).

### **Supplementary Figure 5:**

Noise masker responses from pitch-selective neurons. **a.** Responses of pitch-selective neurons ( $n=8$ ) to the noise masker played alone. **b.** Responses of an individual pitch-selective neuron (Unit M2p-163) to a pure tone at the neuron's CF (60 dB SPL) or an MF (70 dB SPL, 10 dB above threshold) with and without

a noise masker (1.5 oct., 60 dB SPL). The noise masker played alone does not elicit a significant response. Error bars represent SEM. Responses above the dotted line (2 std above the spontaneous discharge rate) are considered significant.

# Bendor and Wang Supplementary Figure 1

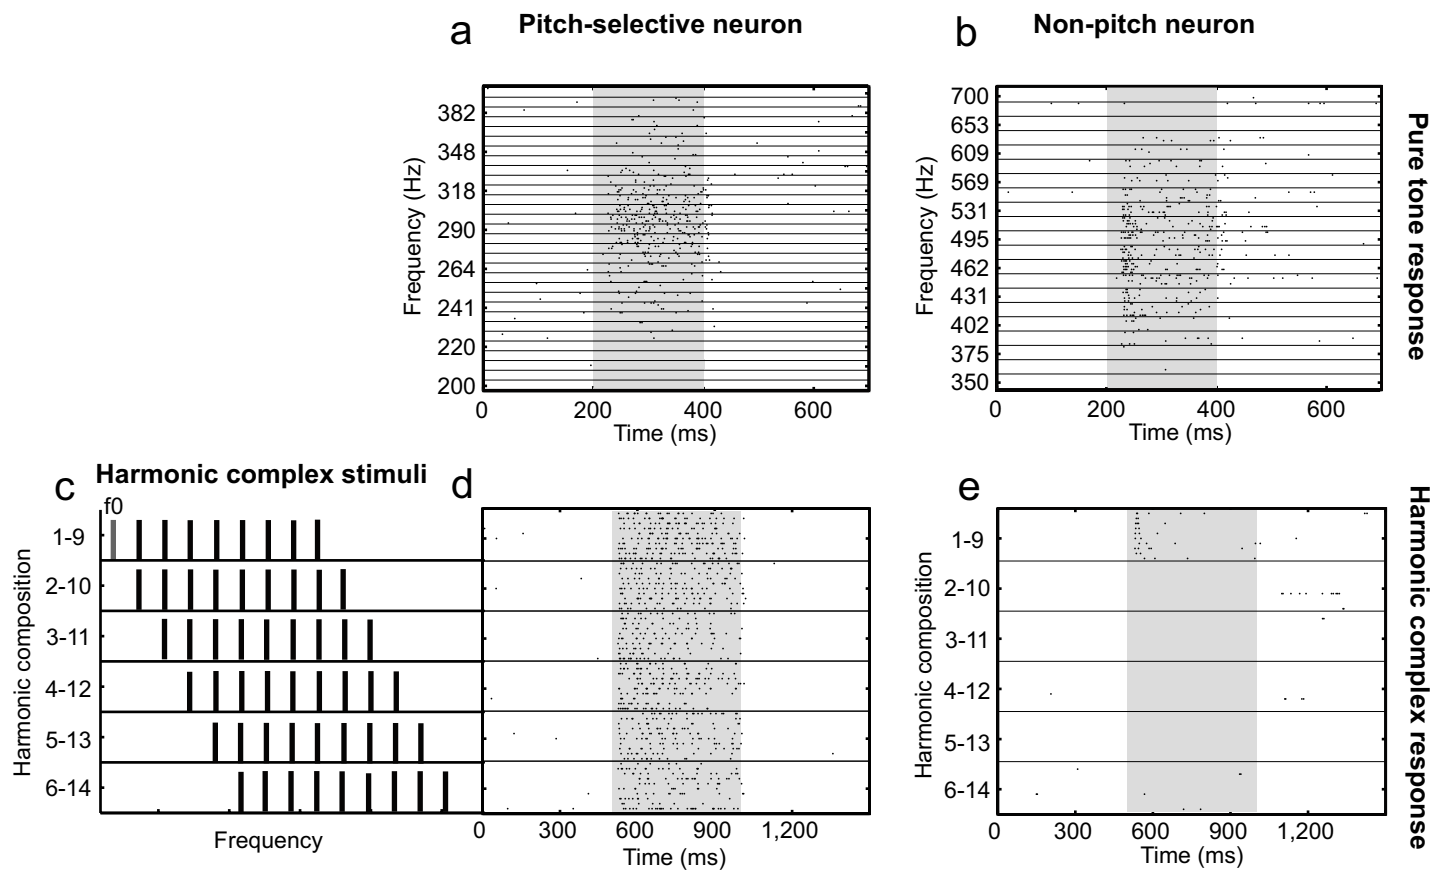

# Bendor and Wang Supplementary Figure 2

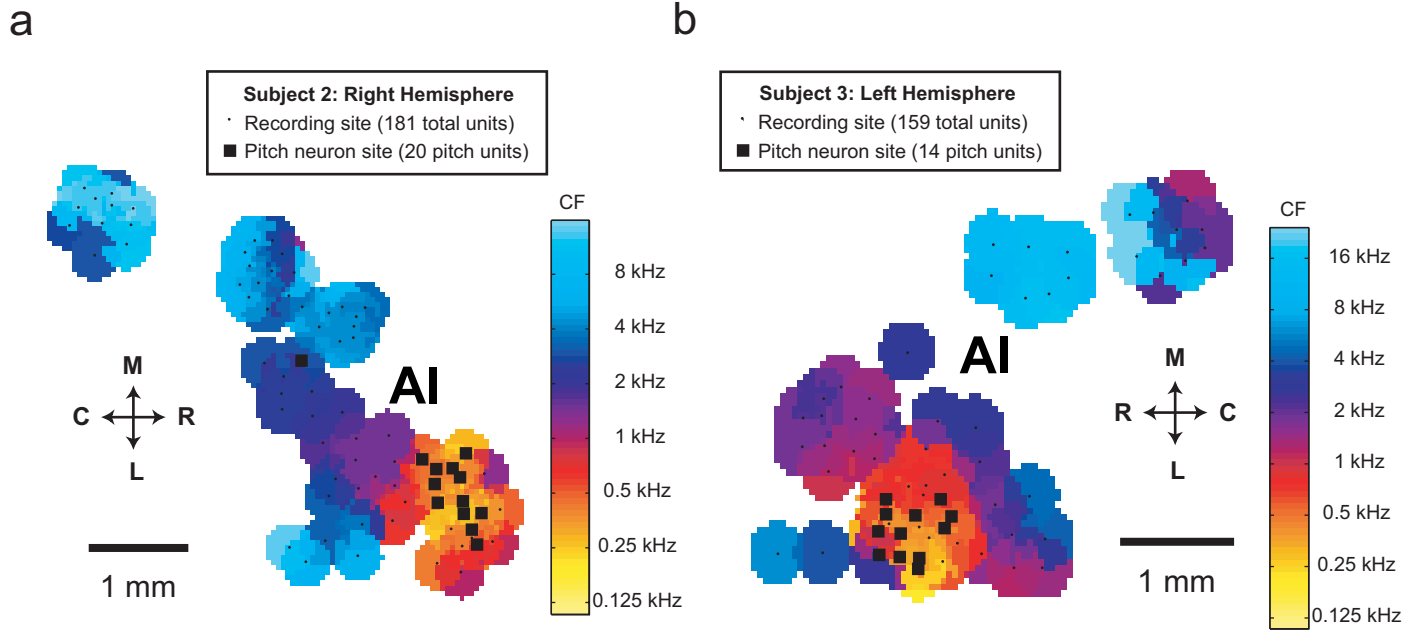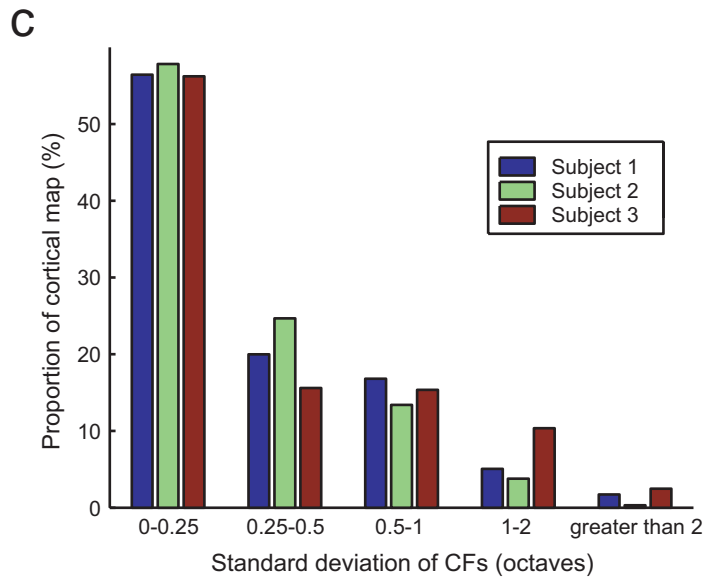

Bendor and Wang Supplementary Figure 3

Individual neuronal responses to pure tones and MFs

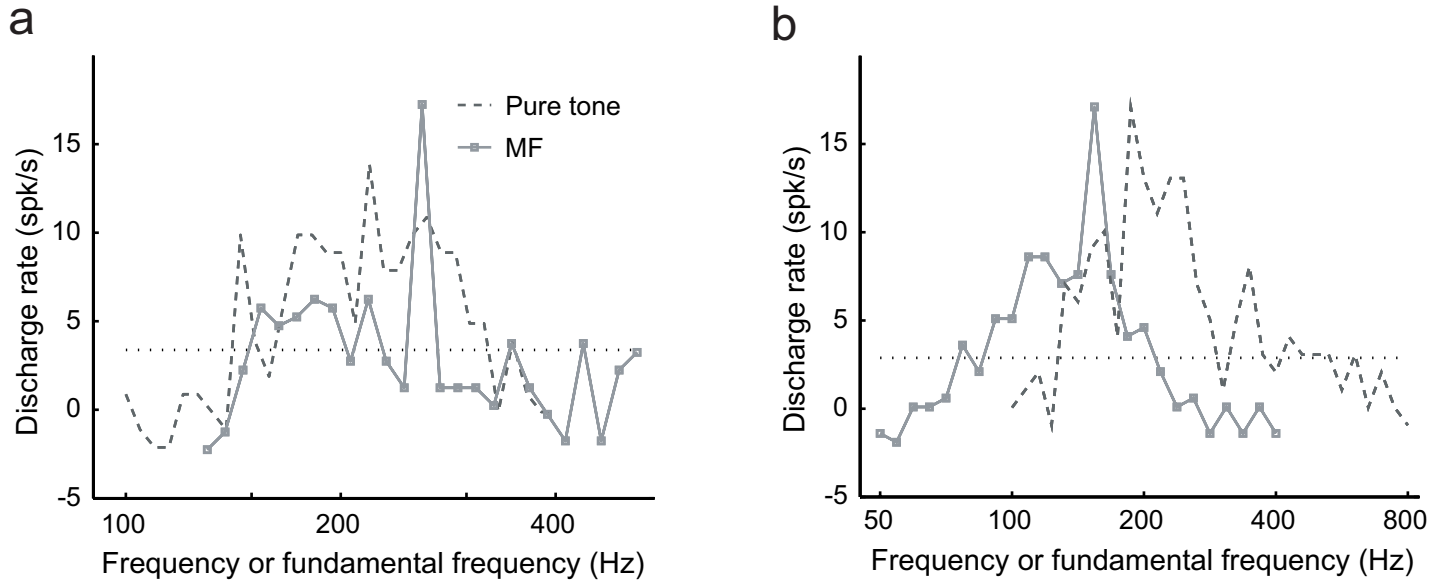

# Bendor and Wang Supplementary Figure 4

**a** A pitch-selective neuron's response to irregular click trains with a tone carrier

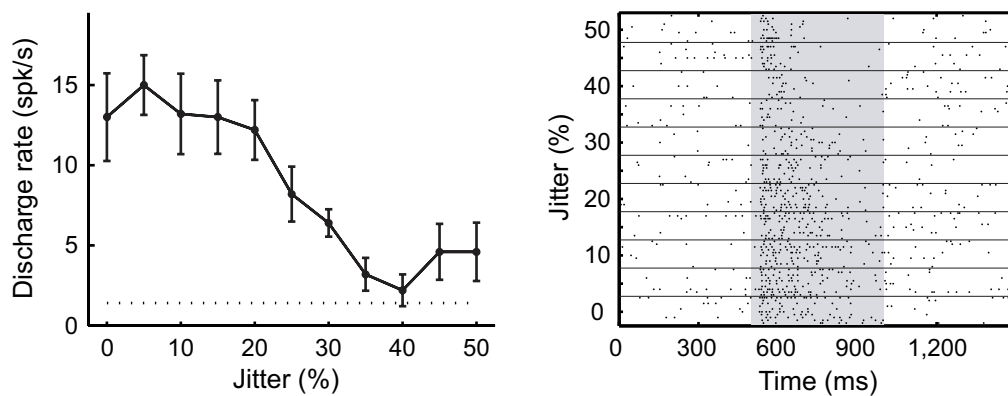

**b** A pitch-selective neuron's response to irregular click trains with a noise carrier

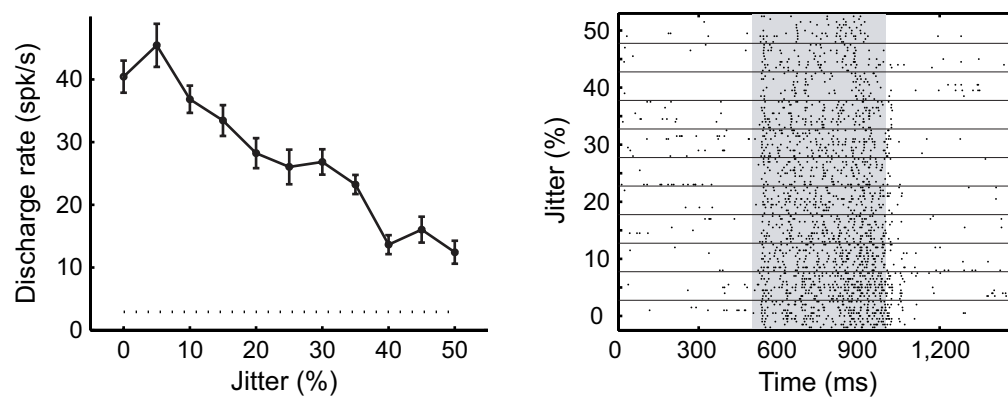

**c** A pitch-selective neuron's response to iterated ripple noise

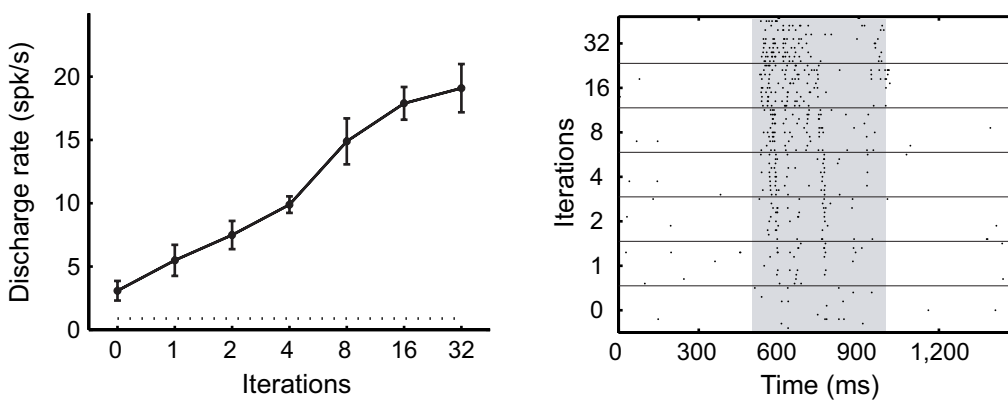

# Bendor and Wang Supplementary Figure 5

**a** Response of pitch selective neurons to noise masker alone (n=8)

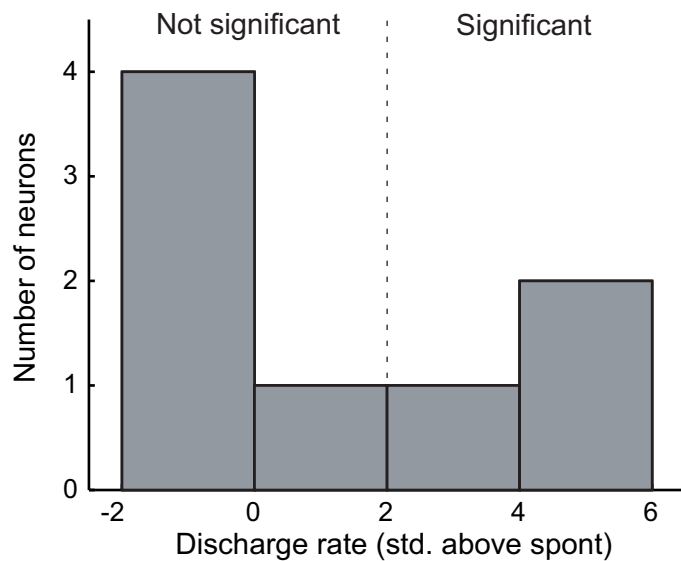

**b** Response of a pitch selective neuron to pure tones and MFs in the presence of a noise masker

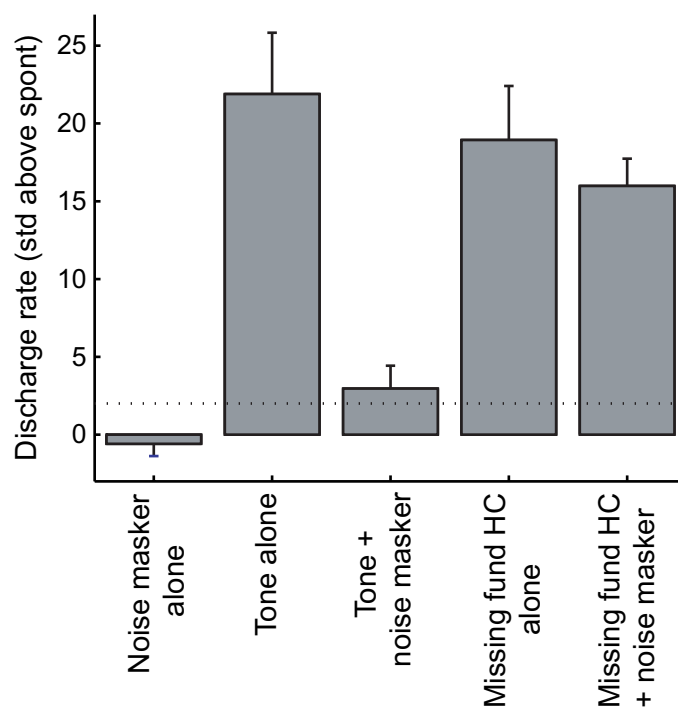

Supplement: NIHMS5164-supplement-sup__material.pdf [file NIHMS5164-supplement-sup__material.pdf]
